# Supplementary material
Source: publisher figshare collection journal article supplement (https://gsapubs.figshare.com/articles/dataset/_/22790180)
Supplement: Supplementary file 1 [file 1]

## Sheet: Sample location
Dröllner et al.: Older than they look: cryptic recycled xenotime on detrital zircon, https://doi.org/10.1130/G51178.1
Table S1. Overview of samples and their location.
Sample	Mineral mount name	Lat	Long	Depth (m)
THB001 (unconsolidated)	HM, Zrc-2	17°25'41.52"S	122°57'47.52"E	3.5-8.6
THB002 (unconsolidated)	X1, X3, X5, X6, X10, X11, HM, Zrc-1, Zrc-2	17°25'41.52"S	122°57'47.52"E	8.6-11.4
THB003 (unconsolidated)	Bd2, Zrc-1	17°26'02.40"S	122°57'50.04"E	8.2-11.1
GPT001 (consolidated*)	GPT	17°58'25.96"S	122°10'33.53"E	Outcrop
* mineral liberation was conducted using high voltage electrical fragmentation (Selfrag, Switzerland)

## Sheet: SIMS xenotime outgrowths
Dröllner et al.: Older than they look: cryptic recycled xenotime on detrital zircon
Table S2. SIMS U-Pb results of xenotime.
Analysis ID	Grain ID (in paper)	f(206)	238U/206Pb	2 sigma	207Pb/206Pb	2 sigma	238U/206Pb	2 sigma	U	Th	Th/U	ΣREE	rho	206Pb/238U	2 sigma	207Pb/206Pb	2 sigma	Discordance		Concordia	2 sigma
		%	204Pb-corrected	abs err	204Pb-corrected	abs err	matrix-corrected	abs err	(ppm)	(ppm)			207Pb/206Pb vs 238U/206Pb	age (Ma)	abs err	age (Ma)	abs err	207Pb/206Pb vs 238U/206Pb (Relative age difference)	Concordia distance	age (Ma)	abs err
Pure xenotime analysis
THB002_X10_R6	X1	-2.12231e-16	15.8972	1.21009	0.0604644	0.0107943	14.2363	1.45804	625.968	1215.44	1.9417	19.1911	0.392221	437.6	43.4	619	386	29	8.1	445.9	39
THB002_HM_R1	X2	-0.0249944	5.34263	0.308281	0.08818	0.00343597	4.99006	0.391611	6000.7	332.538	0.0554165	20.8505	0.828738	1177.5	84.6	1385.5	75	15	11	1291.2	23.6
THB002_Zrc-2-R12^	X3	2.07102	16.344	1.71175	0.0692894	0.0347457	14.8274	1.96667	4062.1	1725.18	0.424701	17.6077	0.204445	420.7	54	906	1034	54	23	424.8	53.2
THB002_X10_R3.1	X4.1	0.73318	17.3589	1.2668	0.0514989	0.00703843	15.3943	1.53755	1802.67	445.693	0.247241	16.816	0.470755	405.7	39.2	262	314	-55	-6.4	395.6	31.6
THB002_X10_R3.2	X4.2	-0.14363	16.9625	1.15618	0.0561293	0.0039519	15.2072	1.42074	3409.35	773.736	0.226945	16.816	0.695256	410.6	37.2	456.5	156.2	10	2.5	417.9	23
Potential zircon component to analysis
GPT001_GPT_R1		0.039897	4.62355	0.200546	0.0971395	0.00483895	3.93141	0.203919	10916.5	2340.51	0.214401		0.656678	1461.1	67.8	1569.1	93.4	6.9	4.7	1504.7	33.2
THB002_Zrc-2-R1		73.3239	72.7157	161.023	0.642268	1.23416	57.8269	161.023	73.7604	397.528	5.38945		0.755283	111	306	4606	2778	98	1500	5.5e-05	231.738
Mixed xenotime-zircon analysis
GPT001_GPT_R2		-0.415553	7.39169	2.23568	0.0804561	0.00812381	6.37459	2.23779	342.479	38.8728	0.113504	13.8875	0.404906	939	306	1207.4	198.8	22	20	1123.1	129.8
XYIN2 (Primary reference material)
XY-1		2.11849e-11	6.09886	0.0405085	0.071689	0.00356742			17498.4	8015.41	0.458064		0.738183	978.75	6.1	976.2	101.4	-0.26	-0.12	978.64	3.92
XY-2		-9.36756e-12	6.4409	0.00484643	0.0696504	0.00300237			18678.6	8590.66	0.45992		0.134279	930.36	0.68	917.1	88.6	-1.4	-0.64	930.34	0.66
XY-3		0.00207163	6.21251	0.0311149	0.0724833	0.0016781			16962.5	7765.67	0.457814		0.867151	962.07	4.46	998.5	47	3.7	1.7	964.88	2.04
XY-4		0.0145088	6.33653	0.0364368	0.0721097	0.00273124			15073.5	6992.8	0.463913		0.767684	944.56	5	988.1	77	4.4	2	946.67	3.04
XY-5		-0.00899247	6.2302	0.0570272	0.0723849	0.00418586			21710.1	10248.5	0.472059		0.785748	959.63	8.16	995.7	117.6	3.6	1.7	961.54	4.76
XY-6		2.11597e-11	6.49392	0.0256043	0.0700833	0.000950031			21717.6	10248.9	0.471917		0.913102	923.28	3.44	929.8	27.8	0.7	0.29	923.95	1.28
XY-7		0.0308527	6.44267	0.00512881	0.069648	0.00177913			17505.4	7976.24	0.455644		0.235077	930.09	0.68	917.1	52.6	-1.4	-0.63	930.05	0.66
XY-8		0.00846484	6.21053	0.0384674	0.0692348	0.00170228			22377.6	10260	0.458496		0.896903	962.36	5.46	904.7	50.6	-6.4	-2.6	957.09	2.16
XY-9		-0.0164766	6.09536	0.0049797	0.0710407	0.00170804			19650.2	9161.74	0.466242		0.268495	979.35	0.74	957.6	49.2	-2.3	-1.1	979.26	0.72
XY-10		0.00205594	6.357	0.0214111	0.0705429	0.00168095			19048.4	8806.58	0.462327		0.743481	941.79	2.9	943.2	48.8	0.15	0.066	941.85	1.86
XY-11		0.0042802	5.97445	0.0373549	0.0706585	0.00374165			21534.2	10413.4	0.483576		0.70288	997.73	5.72	946.7	108.4	-5.4	-2.4	995.81	3.92
XY-12		0.00407742	6.42592	0.00499032	0.0713376	0.00168676			26862.2	12678.6	0.471985		0.247603	932.38	0.68	966.3	48.4	3.5	1.6	932.5	0.66
XY-13		0.00397447	6.31972	0.00608735	0.0719402	0.00171566			23738	10895.1	0.458973		0.30439	946.92	0.84	983.3	48.6	3.7	1.8	947.11	0.8
XY-14		0.00619798	6.04181	0.0229548	0.0707725	0.00167904			14353.2	6743.52	0.469828		0.798253	987.31	3.48	949.9	48.6	-3.9	-1.7	985.2	1.96
XKARG ~ 2640 Ma (Secondary reference material)
XKG-1		0.0157816	2.03771	0.087955	0.177518	0.00715608	1.98167	0.119738	13153.3	15488	1.1775		0.730839	2633.3	130.8	2629.1	67	-0.16	-0.15	2630.4	32.4
XKG-2		0.00139607	2.09293	0.115711	0.179293	0.00246464	1.9867	0.148355	10657.7	13042.5	1.22376		0.970453	2627.8	160.8	2645.6	22.8	0.67	0.73	2643.42	4.84
XKG-3		0.00781494	1.9336	0.0916794	0.17706	0.00246155	1.87906	0.121838	12925.7	15744.2	1.21806		0.9596	2750.7	145.4	2624.8	23.2	-4.8	-5	2642.12	5.76
XKG-4		0.00279044	2.01839	0.103199	0.178597	0.00414168	1.96834	0.13468	13035.8	16622.7	1.27516		0.910705	2648.6	149	2639.2	38.4	-0.36	-0.37	2641.03	12.88
XKG-5		-0.0112184	2.07117	0.0896669	0.177283	0.00253339	2.06134	0.121971	14907.6	19001.5	1.27462		0.949606	2549.9	124.6	2626.8	23.8	2.9	3.1	2615.11	6.16
XKG-6		0.0381361	2.06768	0.092027	0.176003	0.00253014	1.96726	0.124277	10702.5	13695.9	1.27969		0.951594	2649.7	137	2614.8	24	-1.3	-1.4	2619.87	6.44
XPO1 ~ 505 Ma (Secondary reference material [heterogenous])
XPO-1		2.88589	13.0992	1.81264	0.0500839	0.072447	11.2023	2.01695	0.928744	35.9992	38.7612		0.0952282	551.2	95.2	198	3362	-180	-16	549.5	94
XPO-2		9.91832	13.9608	2.59893	0.0329868	0.0690209	11.939	2.81668	0.824005	32.395	39.314		0.0886197	518.5	117.6	0.00015	3574.36	NA	-56	509.7	114.6
XPO-3		32.5369	23.5758	9.62282	0.323881	0.282083	20.1623	9.99054	1.2269	44.5172	36.2843		0.424357	312.1	151	3588	1338	91	180	304.2	152.2
XPO-4		-13.5524	10.9293	1.92371	0.156676	0.0913046	9.34653	2.09418	0.842655	31.9478	37.9133		0.289134	655.2	139.6	2419	988	73	93	671.4	140.2
XPO-5		29.5399	19.737	6.16014	0.233119	0.153585	16.8788	6.46798	0.954415	35.2172	36.8993		0.428125	371	138.2	3073	1052	88	150	372	140
XPO-6		-16.113	11.7414	2.23765	0.16869	0.0930364	10.0411	2.42078	0.975984	35.7883	36.669		0.326598	612	140.8	2544	924	76	100	629.1	141.8
^No REE data (Table S7) could be obtained due to limited space to perform spot analysis using EPMA. Instead using measured REE content, matrix correction for this analysis was performed using the mean REE content of analysis of similar age (i.e., X1, X4.1, and X4.2 = 17.61). The induced uncertainty is assumed to be negligible, given that dominant drivers of matrix correction are the U and Th conc…

## Sheet: SIMS detrital zircon
Dröllner et al.: Older than they look: cryptic recycled xenotime on detrital zircon
Table S3. SIMS U-Pb results of xenotime-bearing detrital zircon.
Analysis ID	Grain ID (in paper)	f(206)	238U/206Pb	2 sigma	207Pb/206Pb	2 sigma	U	Th	Th/U	rho	206Pb/238U	2 sigma	207Pb/206Pb	2 sigma	Discordance		Concordia	2 sigma
		%	204Pb-corrected	abs err	204Pb-corrected	abs err	(ppm)	(ppm)		207Pb/206Pb vs 238U/206Pb	age (Ma)	abs err	age (Ma)	abs err	207Pb/206Pb vs 238U/206Pb (Relative age difference)	Concordia distance	age (Ma)	abs err
Detrital zircon
THB002_X10_R6.1	Z1.1	2.74834	4.81133	0.647045	0.0726798	0.0215148	40.9571	124.991	0.32768	0.56055	1217.3	149.2	1004	600	-21	-9.5	1183.2	102.4
THB002_X10_R6.2	Z1.2	1.75955	4.70336	0.412527	0.0794354	0.0116698	102.566	259.292	0.395563	0.597446	1242.7	99.2	1182	290	-5.1	-2.7	1229.8	63.6
THB002_HM_R1.1	Z2.1	0.236953	3.20557	0.150016	0.10252	0.00270877	786.557	261.95	3.0027	0.896989	1750.3	71.8	1669.4	48.8	-4.8	-3.6	1702.12	13.12
THB002_HM_R1.2	Z2.2	0.287544	2.95484	0.194592	0.115126	0.00527365	202.48	125.249	1.61662	0.71996	1879.1	107.4	1881	82.4	0.1	0.082	1880.2	34.8
THB002_Zrc-2_R12.1	Z3	0.257932	3.63082	0.17535	0.103203	0.00297362	828.51	316.731	2.61581	0.879879	1568.3	67.2	1681.7	53.2	6.7	5.3	1632.64	14.68
THB002_X10_R3.1	Z4.1	5.44912	6.31369	0.396043	0.0602663	0.0210034	1215.34	374.072	3.24893	0.418564	947.8	55.2	612	752	-55	-15	934.5	47.6
THB002_X10_R3.2	Z4.2	0.335524	6.29447	0.294641	0.0726082	0.00268882	1205.63	509.969	2.36413	0.747291	950.5	41.4	1002.1	75.2	5.2	2.6	967.85	19.12
THB002_X10_R3.3		44.9459	5.69012	1.19146	0.138979	0.138027	774.191	818.086	0.946343	0.712184	1044	202	2214	1722	53	60	1111	144.2
GPT001_GPT_R1.1		0.187491	2.70465	0.133796	0.123529	0.00313003	563.694	274.376	2.05446	0.850262	2028.1	86	2007	45	-1.1	-0.9	2014.04	16.1
GPT001_GPT_R2.1		0.741388	4.79265	0.2822	0.0761928	0.00516407	331.902	11.7996	28.1284	0.726857	1221.6	65.6	1099.2	135.4	-11	-5.5	1184.4	31.4
GPT001_GPT_R2.2		0.801004	4.48186	0.379051	0.0835861	0.00888882	107.543	40.7304	2.64037	0.603102	1298.3	99.4	1282	208	-1.3	-0.72	1293.7	58.8
GPT001_GPT_R2.3		2.82409	4.40674	0.260635	0.0858507	0.0123492	349.553	478.037	0.731225	0.557572	1318.4	70.6	1334	278	1.2	0.71	1320.7	50.6
THB002_Zrc-2_R1.1		0.731005	3.38826	0.190278	0.105961	0.00455807	274.903	203.874	1.3484	0.706099	1667.1	82.4	1730.2	79	3.6	2.8	1699.6	31.2
THB002_Zrc-2_R1.2		1.42188	3.77764	0.203846	0.103374	0.00638156	470.173	398.603	1.17955	0.770287	1513.9	72.8	1684.7	114	10	7.4	1577.9	31.2
THB002_Zrc-2_R1.3		0.583356	5.10809	0.282413	0.104709	0.00535501	428.885	420.959	1.01883	0.738883	1152.5	58.4	1708.4	94.2	33	26	1353.5	30
OGC (Secondary reference material)
OGC-1.1		0.161822	1.47823	0.115833	0.296347	0.00885662	102.116	59.9924	1.70214	0.915038	3331	204	3450.5	46.4	3.5	4	3429.73	15.22
OGC-1.2		0.544995	1.31436	0.090278	0.297153	0.00818047	149.152	129.512	1.15165	0.896338	3647.3	191.4	3454.7	42.6	-5.6	-6.2	3488.84	16.06
OGC-1.3		0.519376	1.39501	0.110374	0.305009	0.0090186	101.894	60.349	1.68842	0.917847	3484	212	3495.2	45.8	0.31	0.36	3493.3	15.1
OGC-1.5		0.207336	1.36726	0.0778372	0.300475	0.00548132	253.537	288.84	0.877776	0.909198	3538.6	155	3472	28.2	-1.9	-4.3	3538.59	9.16

## Sheet: LAICPMS xenotime outgrowths&inc
Dröllner et al.: Older than they look: cryptic recycled xenotime on detrital zircon
Table S4. LAICPMS U-Pb results of xenotime outgrowths and inclusions.
Analysis ID	Grain ID (in paper)	238U/206Pb	2 sigma	207Pb/206Pb	2 sigma	rho	206Pb/238U	2 sigma	207Pb/206Pb	2 sigma	Discordance		Concordia	2 sigma
			abs err		abs err	207Pb/206Pb vs 238U/206Pb	age (Ma)	abs err	age (Ma)	abs err	207Pb/206Pb vs 238U/206Pb (Relative age difference)	Concordia distance	age (Ma)	abs err
Pure xenotime analysis
THB002_X6_1_r - 1	X6	5.72201	0.257021	0.0925032	0.00455077	0.0769795	1038.3	43	1476.8	93.2	30	21	1071	45.6
THB002_X11_1_r - 1	X5	18.2885	1.23093	0.0543936	0.00489992	-0.632169	343.2	22.4	386	202	11	1.9	343.6	22.4
THB003_Bd2 _1_r - 1		5.30694	0.298768	0.298993	0.0369234	0.0473541	1112.9	57.6	3464.3	191.4	68	140	1018.7	57.2
THB002_X5_2_r - 1	X9	3.19905	0.143895	0.109952	0.0106628	0.20229	1753.5	69	1797.8	176.4	2.5	2.2	1759	65
THB002_X1_3 _r - 1		3.41409	0.254036	0.574691	0.0396818	0.257759	1656	108.6	4444.6	100.6	63	220	953.1	94.2
THB002_X6_2_r - 1	X8	4.97426	0.158221	0.0805338	0.00306418	0.314281	1180.9	34.4	1209.1	74.8	2.3	1.3	1185.6	31.6
THB002_X6_5_r - 1		18.3706	0.883646	0.228173	0.0344871	-0.0279549	341.69	16	3039	242	89	150	323.65	15.66
THB002_X6_3_r - 1	X7	21.2102	0.736813	0.0535296	0.00453321	0.0149264	296.98	10.08	350.3	191.2	32	6.3	297.14	10.08
Potential zircon component to analysis
THB002_X3_r_1 - 1		4.15336	0.136508	0.0894754	0.00574841	0.170687	1390.7	41.2	1413.6	123	1.6	1.1	1392.9	39.2
THB002_Zrc-1_1_r - 1		10.0665	1.20408	0.122481	0.0146812	0.607319	610.5	69.6	1992	214	69	79	501.5	68.8
THB002_X1_2_r - 1		12.6746	0.615904	0.0686445	0.00777709	0.0836361	489.5	23	887	234	45	19	489.7	23
THB002_X6_6 _r - 1		3.72159	0.12276	0.102029	0.00394161	0.420222	1534.2	45	1660.5	71.4	7.6	5.6	1567	40.2
THB002_X11_2_r - 1		11.3366	0.635499	0.0745136	0.0140868	0.047591	544.9	29.2	1054	380	48	24	544.7	29.4
Mixed xenotime-zircon analysis
THB002_X1_r_1 - 1		12.0027	0.338254	0.0597281	0.00290717	0.331299	515.88	13.98	592.8	105.6	13	3.5	516.93	13.92
THB001_Zrc-2_2_r - 1		15.5781	0.842816	0.0509627	0.00892799	0.23764	401.1	21	238	404	-69	-7.1	400.4	21
THB003_Zrc-1_1_r - 1		10.9334	1.07621	0.0636345	0.010218	-0.0531096	564.2	53.2	728	340	23	7.5	566.5	53.2
THB002_X1_5 _r - 1		12.7651	0.580018	0.0587475	0.00889102	0.133396	486.2	21.2	557	330	13	3.2	486.4	21.2
THB002_X3_2_r - 1		2.1979	0.0578559	0.1951	0.00947304	0.00755148	2417.4	53	2784.9	79.6	13	18	2502.2	50.4
THB002_X5_6_r - 1		16.1246	0.517052	0.058319	0.00509795	-0.126273	387.88	12.08	540.8	191.2	28	6.9	388.19	12.08
THB002_X5_5 _r - 1		13.0095	0.602791	0.0582992	0.00849939	0.218327	477.4	21.4	540	318	12	2.8	477.6	21.4
THB002_X11_4_r - 1		19.5912	1.5334	0.0665937	0.021654	-0.0818371	320.9	24.6	824	678	61	23	320.6	24.6
X_6413 (Primary reference material)
6413 - 1		5.99147	0.155746	0.0722265	0.00236327	0.388262	995	24	991.5	66.4	-0.35	-0.16	994.6	22.6
6413 - 2		6.01906	0.56455	0.0734793	0.00789356	0.729887	990.8	86.2	1026	218	3.5	1.6	995.4	81
6413 - 3		6.00209	0.185597	0.0729057	0.00260906	0.258984	993.4	28.4	1010.5	72.6	1.7	0.77	995.6	26.6
6413 - 4		6.03605	0.159286	0.0737406	0.00256643	0.331414	988.2	24.2	1033.5	70.4	4.4	2.1	992.7	23.2
6413 - 5		6.02471	0.191529	0.0708069	0.00304197	0.644953	989.9	29.2	951	87.8	-4.1	-1.8	985.9	27.4
6413 - 6		6.03699	0.145021	0.0722069	0.00269516	0.45797	988.1	22	991	76	0.29	0.13	988.3	21.2
6413 - 7		6.03528	0.246262	0.0757374	0.00265939	0.475364	988.3	37.4	1087.3	70.4	9.1	4.5	1008	34.6
6413 - 8		6.0505	0.192157	0.0693819	0.00294513	0.245799	986	29	909.1	87.6	-8.5	-3.5	977.5	27
6413 - 9		6.02851	0.146215	0.0707272	0.00380126	0.0458318	989.4	22.2	948.7	110	-4.3	-1.9	987.6	21.8
6413 - 10		6.05777	0.198898	0.0700452	0.00443219	0.587495	984.9	30	928.9	129.8	-6	-2.6	981.8	29
6413 - 11		6.04676	0.187125	0.0718069	0.00358342	0.535981	986.6	28.4	979.6	101.6	-0.71	-0.32	986.1	27.2
6413 - 12		6.07617	0.241958	0.070556	0.00321792	0.284607	982.2	36.2	943.8	93.4	-4.1	-1.7	976.9	33.4
6413 - 13		6.04452	0.200137	0.0716582	0.00272739	0.109411	986.9	30.2	975.4	77.6	-1.2	-0.52	985.4	28.2
6413 - 14		6.03737	0.153681	0.0717124	0.00261873	0.319791	988	23.4	976.8	74.4	-1.1	-0.51	987	22.2
6413 - 15		6.03733	0.180318	0.0755822	0.00308971	0.255324	988	27.4	1083.1	82	8.8	4.4	996.2	26.6
6413 - 16		6.02329	0.210775	0.0727146	0.00245875	0.414982	990.2	32.2	1005	68.6	1.5	0.66	992.8	29.2
6413 - 17		6.03575	0.174873	0.0739327	0.00305956	0.197038	988.3	26.6	1038.6	83.6	4.9	2.3	992.5	25.6
6413 - 18		6.03883	0.166703	0.0720451	0.00200467	0.466414	987.8	25.2	986.4	56.4	-0.14	-0.061	987.6	23
6413 - 19		5.99273	0.187021	0.071054	0.00268431	0.43279	994.8	28.8	957.9	77	-3.9	-1.7	990.1	26.6
6413 - 20		6.04537	0.183565	0.0737425	0.00301494	0.221405	986.8	27.8	1033.5	82.4	4.5	2.1	991.2	26.6
X_MG1 (Secondary reference material)
MG1 - 1		12.11	0.587001	0.0567339	0.00760199	0.099855	511.5	23.8	480	296	-6.5	-1.4	511.3	23.8
MG1 - 2		12.2717	0.55354	0.0459758	0.0073445	-0.0905682	505	22	0.00015	380.118	NA	-22	500.1	21.6
MG1 - 3		12.4996	0.45937	0.0587593	0.00729189	0.0738316	496.14	17.54	557	270	11	2.8	496.35	17.54
MG1 - 4		12.947	0.53989	0.0674746	0.0106093	-0.08767	479.61	19.28	851	326	44	17	479.7	19.32
MG1 - 5		13.0252	0.531428	0.0608729	0.0101426	0.342716	476.84	18.76	634	358	25	7.2	477.08	18.76

## Sheet: LAICPMS detrital xenotime
Dröllner et al.: Older than they look: cryptic recycled xenotime on detrital zircon
Table S5. LAICPMS U-Pb results of detrital xenotime.
Analysis ID	238U/206Pb	2 sigma	207Pb/206Pb	2 sigma	rho	206Pb/238U	2 sigma	207Pb/206Pb	2 sigma	Discordance		Concordia	2 sigma
		abs err		abs err	207Pb/206Pb vs 238U/206Pb	age (Ma)	abs err	age (Ma)	abs err	207Pb/206Pb vs 238U/206Pb (Relative age difference)	Concordia distance	age (Ma)	abs err
Detrital (10 μm spot size)*
THB001_HM_3_d - 1	3.22826	0.0853976	0.107859	0.00377907	0.660367	1739.5	40.4	1762.7	64	1.3	0.98	1748	20.4
THB001_HM_3_d - 2	3.19177	0.0730363	0.10893	0.00363704	0.441091	1757	35.2	1780.8	60.8	1.3	1	1764.5	23.4
THB001_HM_3_d - 3	3.14999	0.0583754	0.109226	0.00366363	0.482504	1777.3	28.8	1785.7	61.2	0.47	0.37	1779.56	19.52
THB001_HM_3_d - 4	3.23713	0.0718008	0.108509	0.00320486	0.453235	1735.4	33.8	1773.7	54	2.2	1.6	1748.5	21.8
THB001_HM_3_d - 5	3.19329	0.0586526	0.107205	0.00372648	0.57336	1756.2	28.2	1751.6	63.6	-0.26	-0.2	1755	17.7
THB001_HM_3_d - 6	3.19119	0.0876463	0.108124	0.00384671	0.390489	1757.2	42.2	1767.2	65	0.57	0.42	1760.7	28
THB001_HM_3_d - 7	3.24283	0.0817906	0.106733	0.00425872	0.390474	1732.7	38.4	1743.5	73.2	0.62	0.47	1735.8	27.2
THB001_HM_3_d - 8	3.30731	0.0867617	0.106221	0.00388295	0.289892	1703	39.2	1734.7	67	1.8	1.4	1712.6	29.2
THB001_HM_5_d - 1	5.67368	0.1904	0.0766403	0.00463109	0.57875	1046.5	32.4	1110.9	120.6	5.8	2.9	1056.9	22.8
THB001_HM_5_d - 2	5.19395	0.125367	0.07825	0.00299654	0.297834	1135.1	25.2	1152.3	76	1.5	0.78	1137.8	21
THB001_HM_5_d - 3	5.14918	0.0968457	0.0770122	0.00248619	0.502637	1144.12	19.72	1120.6	64.4	-2.1	-1	1139.93	14.32
THB001_HM_5_d - 4	5.15435	0.179552	0.0772298	0.00308483	0.519807	1143.1	36.4	1126.2	79.6	-1.5	-0.75	1138.6	23.8
THB001_HM_5_d - 5	5.48721	0.142477	0.0776852	0.00330737	0.327482	1079.2	25.8	1137.9	84.6	5.2	2.7	1087.7	21.8
THB001_HM_7_d - 1	4.48199	0.121669	0.083914	0.00279271	0.114102	1298.3	32	1289.7	64.8	-0.67	-0.38	1296.4	27.2
THB001_HM_7_d - 2	4.40991	0.169056	0.0864799	0.00492184	0.71725	1317.5	45.6	1348.1	109.8	2.3	1.3	1325.6	24.2
THB001_HM_7_d - 3	4.47165	0.0864827	0.0855566	0.00457726	0.333054	1301	22.8	1327.3	103.6	2	1.2	1303.67	19.74
THB001_HM_7_d - 4	4.35624	0.0878755	0.0852817	0.00343587	0.423533	1332.2	24.2	1321.1	78	-0.84	-0.5	1330.3	18.82
THB001_HM_8_d - 1	3.75139	0.105369	0.0929031	0.00399115	0.676058	1523.4	38.2	1485.1	81.4	-2.6	-1.7	1512.2	20.4
THB001_HM_8_d - 2	3.81518	0.102541	0.0954429	0.00325368	0.494353	1500.6	36	1536	64.2	2.3	1.5	1511.8	23
THB001_HM_8_d - 3	3.56478	0.0857512	0.0940903	0.00383819	0.369889	1594	34	1509.1	77	-5.6	-3.7	1573.4	25
THB001_HM_8_d - 4	3.71362	0.100455	0.0969817	0.00382137	0.621991	1537.1	37	1566	73.8	1.8	1.2	1545.8	21.4
THB001_HM_9_d - 1	3.17234	0.0898574	0.107875	0.00368412	0.487376	1766.4	43.8	1763	62.4	-0.19	-0.14	1765.1	25.8
THB001_HM_9_d - 2	3.14876	0.0777145	0.107247	0.00388368	0.478715	1777.9	38.4	1752.3	66.2	-1.5	-1.1	1769.6	24.4
THB001_HM_9_d - 3	3.12132	0.0805187	0.11016	0.00440946	0.354379	1791.6	40.4	1801.2	72.8	0.54	0.42	1794.4	29
THB001_HM_9_d - 4	3.12188	0.0601342	0.108273	0.00344147	0.600247	1791.3	30.2	1769.7	58	-1.2	-0.92	1784.65	17.42
THB001_HM_13_d - 1	2.78404	0.0898516	0.12406	0.00715318	0.214172	1978.3	55	2014.6	102.2	1.8	1.6	1987.8	44
THB001_HM_15_d - 1	4.96393	0.163155	0.0851381	0.00332259	0.370604	1183.1	35.6	1317.8	75.6	10	6	1215.4	27.4
THB001_HM_25_d - 1	13.3532	0.334103	0.0746447	0.00384541	0.134678	465.54	11.24	1058	103.6	56	28	470.5	11.3
THB001_HM_31_d - 1	2.92343	0.104862	0.117739	0.00519637	0.410734	1896.6	59	1921.4	79.2	1.3	1	1906.4	36.8
THB001_HM_33_d - 1	2.26478	0.0589286	0.158143	0.0053383	0.450794	2357.5	51.4	2435.1	57.2	3.2	3.1	2393.2	28.8
THB001_HM_42_d - 1	3.17214	0.11232	0.106237	0.00377035	0.40696	1766.5	54.8	1735	65	-1.8	-1.3	1752.6	32
THB001_HM_53_d - 1	1.99303	0.0614245	0.186157	0.00689525	0.343456	2621.3	66.4	2707.8	61.2	3.2	3.2	2666.9	37.2
X_6413 (Primary reference material, 10 μm spot size)
6413 - 21	5.99038	0.170644	0.0723572	0.00279316	0.260844	995.2	26.2	995.1	78.4	-0.011	-0.0048	995.2	22.4
6413 - 23	6.03097	0.150028	0.0719961	0.00263661	0.371053	989	22.8	984.9	74.6	-0.41	-0.18	988.35	18.42
6413 - 24	6.08551	0.172756	0.0736835	0.00291406	0.663357	980.8	25.8	1031.9	80	5	2.3	991.3	15.8
6413 - 27	6.0712	0.145231	0.0709884	0.00252513	0.309009	982.9	21.8	956.2	72.8	-2.8	-1.2	979.02	18.24
6413 - 28	5.95818	0.132196	0.073097	0.00261961	0.439112	1000.2	20.6	1015.7	72.6	1.5	0.7	1002.56	16.08
6413 - 29	6.08253	0.150316	0.0718994	0.00304684	0.569686	981.2	22.4	982.2	86.2	0.098	0.043	981.37	15.82
6413 - 30	5.97204	0.128965	0.0722222	0.00284829	0.508053	998.03	19.96	991.3	80.2	-0.68	-0.3	997.06	14.98
6413 - 31	6.0583	0.129554	0.0740282	0.00311653	0.63652	984.85	19.54	1041.3	85	5.4	2.5	993.08	13.14
6413 - 32	6.0148	0.139039	0.0727881	0.00221914	0.494138	991.5	21.2	1007.1	61.8	1.6	0.71	994.54	15.36
6413 - 33	6.01865	0.105631	0.0711936	0.00292932	0.452286	990.86	16.12	962.1	84	-3	-1.3	987.89	13
6413 - 35	5.99522	0.133806	0.0725722	0.00316527	0.331767	994.5	20.6	1001.1	88.6	0.67	0.3	995.17	17.68
6413 - 36	5.96543	0.158058	0.071401	0.00271895	0.28356	999.1	24.6	968	77.8	-3.2	-1.4	994.4	20.6
6413 - 38	5.9507	0.142956	0.0731671	0.00280737	0.451158	1001.3	22.2	1017.7	77.8	1.6	0.73	1003.9	17.24
6413 - 39	6.12932	0.172596	0.0723594	0.00271683	0.15388	974.3	25.4	995.2	76.4	2.1	0.94	977	23
6413 - 40	6.06351	0.12376	0.0722162	0.00303953	0.392911	984.07	18.62	991.1	85.6	0.71	0.32	984.83	15.54
X_MG1 (Secondary reference material, 10 μm spot size)
MG1 - 6	12.6757	0.502855	0.0573543	0.00718925	0.231267	489.5	18.7	504	276	2.9	0.66	489.79	17.88
MG1 - 7	12.8464	0.437	0.0604332	0.0076795	0.336154	483.23	15.84	618	274	22	6.1	485.95	14.72
MG1 - 8	12.6118	0.531901	0.058846	0.00662013	0.452095	491.89	19.98	560	246	12	3.1	494.55	17.26
MG1 - 9	12.5009	0.527951	0.060039	0.00661509	0.182946	496.1	20.2	604	238	18	4.9	498.19	19.6
MG1 - 10	12.5402	0.406022	0.0526423	0.0066367	0.0585223	494.59	15.42	312	286	-58	-8.1	493.16	15.24
*Mutliple spots were analyzed for some grains, e.g., grain THB001_HM_3_d has been analyzed at 8 different spots. For the Concordia diagram (Fig. 3A) weighted means of isotope ratios are plotted; for the kernel density diagram (Fig. 3B), concordia ages of the individual grains are used (i.e., one grain contributes one age to the plot)

## Sheet: LAICPMS detrital zircon
Dröllner et al.: Older than they look: cryptic recycled xenotime on detrital zircon
Table S6. LA-ICP-MS U-Pb results of xenotime-bearing detrital zircon.
Analysis ID	Grain ID (in paper)	238U/206Pb	2 sigma	207Pb/206Pb	2 sigma	rho	U	2 sigma	Th	2 sigma	Th/U	206Pb/238U	2 sigma	207Pb/206Pb	2 sigma	Discordance		Concordia	2 sigma
			abs err		abs err	207Pb/206Pb vs 238U/206Pb	(ppm)	abs err	(ppm)	abs err		age (Ma)	abs err	age (Ma)	abs err	207Pb/206Pb vs 238U/206Pb (Relative age difference)	Concordia distance	age (Ma)	abs err
Detrital
THB002_X6_1_r - 1	Z6	4.19586	0.222211	0.0827544	0.0177831	0.197872	54.6461	2.02894	703.8	23.8794	12.8792	1378	65.6	1262	420	-9.2	-5.6	1371.5	61
THB002_X11_1_r - 1	Z5	3.17118	0.0352254	0.111764	0.0213727	0.42014	390.141	11.5133	184.771	7.61357	0.4736	1767.02	17.06	1827	346	3.3	3.2	1768.32	15.18
THB003_Bd2 _1_r - 1		5.37134	0.0948697	0.0900505	0.0178989	0.265705	43.3019	1.39046	138.375	2.00735	3.19558	1100.68	17.9	1426	380	23	16	1104.69	17.12
THB002_X1_r_1 - 1		4.74147	0.167643	0.115597	0.0219902	-0.297175	894.345	12.8295	159.187	6.81432	0.177993	1233.7	39.8	1888	342	35	36	1216.1	38.4
THB002_X3_r_1 - 1		4.2633	0.0661484	0.0886258	0.0171054	0.0446636	248.439	8.53193	107.087	7.93748	0.431041	1358.44	18.96	1395	370	2.6	1.9	1358.6	18.9
THB002_X5_r_2 - 1	Z9	3.25715	0.0269169	0.106488	0.0203653	0.0955326	653.226	9.52106	319.766	12.0842	0.489519	1726.08	12.56	1739	350	0.76	0.72	1726.14	12.44
THB002_X6_3_r - 1	Z7	17.1635	0.366818	0.0534509	0.0110067	0.397604	776.178	31.2227	84.4039	18.3137	0.108743	365.06	7.58	347	466	-5.2	-0.8	364.94	6.9
THB001_Zrc-2_2_r - 1		3.73333	0.10439	0.0984323	0.0189553	-0.0986934	166.684	2.1223	13.2776	0.503921	0.0796571	1530	38	1594	360	4	3.4	1530	38
THB002_Zrc-1_1_r - 1		5.05272	0.0725429	0.0787874	0.0151563	0.25902	271.331	15.3059	473.181	57.5474	1.74392	1164.04	15.38	1166	382	0.17	0.096	1164.06	14.7
THB003_Zrc-1_1_r - 1		3.57295	0.081698	0.102466	0.0200162	0.165154	109.027	2.63333	40.6878	1.04925	0.373192	1590.7	32.4	1669	362	4.7	4.1	1592.4	31.4
THB002_X1_3 _r - 1		3.89372	0.0352288	0.106357	0.0207833	0.0140071	326.153	7.13578	343.07	10.7633	1.05187	1473.48	11.84	1737	358	15	14	1473.73	11.84
THB002_X1_2_r - 1		5.44335	0.0533454	0.073111	0.0140822	0.154377	260.459	7.21982	116.695	2.89409	0.448037	1087.28	9.74	1016	390	-7	-3.5	1086.96	9.58
THB002_X1_7 _r - 1		5.94237	0.0582657	0.073197	0.0140011	0.391923	535.274	22.5886	546.673	30.6048	1.02129	1002.7	9.06	1019	388	1.6	0.78	1002.85	8.28
THB002_X1_5 _r - 1		4.86448	0.0543553	0.0856542	0.0165217	0.267018	192.001	7.90884	337.072	20.2841	1.75558	1205.29	12.2	1329	374	9.3	6.3	1206.43	11.66
THB002_X3_2_r - 1		2.4863	0.031175	0.176193	0.0337033	0.636188	1342.71	17.1122	1069.64	26.4232	0.796629	2179.4	23	2617	318	17	25	2197.04	17.22
THB002_X5_4_r - 1		6.5841	0.247936	0.0871282	0.0173348	0.300475	164.795	7.50301	187.897	11.9794	1.14019	911.5	32	1363	384	33	22	922	30.4
THB002_X5_6_r - 1		12.6157	0.197758	0.0675402	0.013183	0.053843	699.668	11.1063	353.245	23.3444	0.504875	491.73	7.44	854	406	42	17	492.04	7.42
THB002_X5_5 _r - 1		9.37265	0.154589	0.106482	0.020818	0.12749	1564.96	31.9535	2684.42	129.685	1.71533	653.49	10.28	1739	358	62	55	655.92	10.22
THB002_X6_2_r - 1	Z8	4.9246	0.0587806	0.0788777	0.0152118	0.226925	153.583	2.61959	219.187	4.33902	1.42715	1191.66	13.04	1168	382	-2	-1.2	1191.45	12.58
THB002_X6_5_r - 1		12.6221	0.183112	0.0658559	0.0127897	0.20539	445.946	11.2663	625.052	22.0767	1.40163	491.51	6.86	801	406	39	14	492.52	6.7
THB002_X6_6 _r - 1		3.78727	0.0583571	0.0992524	0.0190651	0.209028	1366.93	48.0784	773.255	12.999	0.565686	1510.6	20.6	1609	358	6.1	5.2	1511.98	19.94
THB002_X11_2_r - 1		11.1685	0.24123	0.0732099	0.0153566	0.183423	56.2013	0.764096	87.0911	1.60151	1.54963	552.78	11.44	1019	424	46	22	554.73	11.24
THB002_X11_1_r - 1		10.4289	0.252928	0.0949527	0.0183734	-0.443526	1155.09	44.9787	1643.51	93.6972	1.42284	590.26	13.68	1526	364	61	47	578.26	12.18
THB002_X11_4_r - 1		7.89445	0.173832	0.107705	0.0207379	-0.321603	940.345	25.0681	889.755	42.422	0.9462	768.89	15.98	1760	352	56	51	757.73	15.06
Z_GJ1 (Primary reference material)
GJ1 - 1		10.2504	0.117889	0.0601887	0.0117048	0.456634	287.424	6.61212	9.47999	0.253836	0.0329826	600.1	6.6	609	420	1.5	0.43	600.17	5.82
GJ1 - 2		10.1986	0.139813	0.0597284	0.0115929	0.406414	288.103	5.67521	9.64138	0.233817	0.033465	602.96	7.9	593	420	-1.7	-0.46	602.88	7.14
GJ1 - 3		10.2725	0.106952	0.0608159	0.0117641	0.161156	284.702	5.89985	9.45398	0.242299	0.0332065	598.87	5.96	632	416	5.2	1.5	598.95	5.86
GJ1 - 4		10.2602	0.129495	0.0597428	0.0115754	0.227726	286.507	6.0416	9.3728	0.26067	0.032714	599.54	7.2	593	420	-1.1	-0.29	599.51	6.98
GJ1 - 5		10.1383	0.0984327	0.0599758	0.0116141	0.276171	286.536	5.72391	9.55949	0.23507	0.0333623	606.43	5.6	602	418	-0.76	-0.21	606.41	5.36
GJ1 - 6		10.2831	0.128678	0.0602855	0.0116511	0.365712	285.775	5.55509	9.46478	0.2363	0.0331197	598.26	7.16	613	418	2.4	0.68	598.36	6.62
GJ1 - 7		10.267	0.123124	0.0602875	0.011688	0.159363	294.358	6.12085	9.51567	0.252698	0.0323269	599.15	6.86	613	418	2.3	0.64	599.19	6.74
GJ1 - 8		10.1971	0.116204	0.0599653	0.0116749	0.209122	285.784	6.06227	9.65025	0.249882	0.0337676	603.08	6.54	602	422	-0.26	-0.072	603.07	6.38
GJ1 - 9		10.2564	0.120214	0.0600026	0.0116436	-0.00891624	283.426	5.03502	9.38817	0.226699	0.0331239	599.76	6.7	603	420	0.47	0.13	599.76	6.7
GJ1 - 10		10.249	0.117095	0.0603953	0.0117469	0.280748	290.554	6.95097	9.62546	0.265963	0.0331279	600.16	6.54	617	420	2.7	0.77	600.23	6.26
GJ1 - 11		10.2548	0.116477	0.0600867	0.0116524	0.227765	288.182	5.7011	9.49117	0.234073	0.0329346	599.82	6.48	606	420	0.99	0.28	599.84	6.28
GJ1 - 12		10.2314	0.115175	0.0600449	0.0116063	0.222456	285.789	5.46834	9.50528	0.239282	0.0332598	601.16	6.46	604	418	0.48	0.13	601.17	6.28
GJ1 - 13		10.285	0.137455	0.0606806	0.0118016	0.359131	289.244	6.29955	9.45327	0.252787	0.0326827	598.15	7.6	627	420	4.6	1.3	598.34	7.06
GJ1 - 14		10.244	0.131526	0.0596384	0.0116095	0.423948	283.995	5.68561	9.50262	0.257584	0.0334605	600.44	7.38	590	422	-1.8	-0.5	600.35	6.66
GJ1 - 15		10.2312	0.133295	0.0600485	0.0116713	0.171814	287.168	4.90579	9.59803	0.238568	0.033423	601.16	7.46	604	420	0.54	0.15	601.17	7.32
GJ1 - 16		10.232	0.114079	0.0604906	0.0117056	0.369309	288.116	5.50974	9.49412	0.242785	0.0329524	601.11	6.4	620	418	3.1	0.88	601.22	5.9
GJ1 - 17		10.2704	0.121806	0.0593883	0.0115843	0.40811	288.126	5.64382	9.61235	0.24101	0.0333616	598.98	6.8	580	424	-3.2	-0.85	598.86	6.16
GJ1 - 18		10.2431	0.11392	0.0606124	0.0117533	0.198612	281.359	6.24689	9.25427	0.243065	0.0328913	600.49	6.38	624	418	3.8	1.1	600.57	6.24
GJ1 - 19		10.2152	0.130698	0.0600161	0.0116096	0.295358	288.598	5.61486	9.54875	0.257583	0.0330867	602.06	7.38	603	418	0.21	0.058	602.07	7
GJ1 - 20		10.2554	0.116931	0.060437	0.0117674	0.230632	289.047	5.77201	9.62187	0.262184	0.0332882	599.82	6.54	618	420	3	0.86	599.89	6.34
GJ1 - 21		10.2374	0.131175	0.0596052	0.0115406	0.299008	291.06	5.78715	9.61964	0.274966	0.0330503	600.83	7.34	588	420	-2.1	-0.57	600.76	6.96
GJ1 - 22		10.2466	0.136721	0.0606938	0.0117836	0.213035	283.381	5.38624	9.43415	0.243816	0.0332914	600.27	7.66	627	418	4.3	1.2	600.38	7.46
GJ1 - 23		10.2379	0.111497	0.060071	0.0116397	0.263743	286.744	6.03313	9.49257	0.255521	0.0331047	600.77	6.22	605	420	0.72	0.2	600.79	5.98
Z_91500 (Secondary reference material)
91500 - 1		5.61725	0.143041	0.0701876	0.0145859	0.185557	58.4266	1.1913	29.6108	0.626398	0.506803	1056.2	24.8	933	426	-13	-6	1054.3	24
91500 - 2		5.59958	0.159105	0.0790901	0.0169454	0.308253	56.1874	1.0968	28.6128	0.612315	0.509239	1059.2	27.8	1173	424	9.7	5.6	1061.7	26
91500 - 3		5.56791	0.100216	0.0746962	0.0148689	0.259368	56.1819	1.25194	28.8443	0.636439	0.51341	1064.78	17.62	1060	400	-0.49	-0.26	1064.71	16.82
91500 - 4		5.60207	0.108044	0.0747749	0.0149736	0.227479	56.7673	1.43414	29.5182	0.727441	0.519986	1058.82	18.82	1061	402	0.25	0.13	1058.85	18.1
91500 - 5		5.54983	0.0871379	0.0737148	0.0145187	0.2866	60.4696	0.976083	31.6811	0.572999	0.523917	1067.96	15.42	1033	398	-3.4	-1.7	1067.51	14.58
91500 - 6		5.59024	0.117515	0.0719601	0.0148243	0.288339	56.7533	0.90448	29.1685	0.517928	0.513952	1060.9	20.6	984	420	-7.8	-3.7	1059.61	19.42
91500 - 7		5.56698	0.139048	0.0786063	0.0161712	0.132233	61.3761	1.19353	32.1643	0.6342	0.524053	1065	24.6	1161	408	8.3	4.8	1066	24.2
91500 - 8		5.64169	0.148	0.0779258	0.0162205	0.129337	59.7791	1.16293	31.4209	0.666865	0.525617	1051.9	25.4	1144	414	8.1	4.6	1052.9	25
91500 - 9		5.62976	0.13691	0.0726002	0.0147461	0.133408	60.3093	1.14665	31.7309	0.707096	0.526136	1054	23.6	1002	412	-5.2	-2.5	1053.4	23.2
91500 - 10		5.66191	0.13238	0.0854282	0.017511	0.362394	56.4178	1.00832	29.3997	0.572278	0.521107	1048.5	22.6	1324	396	21	14	1054	20.8
91500 - 11		5.59855	0.106545	0.0660068	0.0130657	0.241672	55.9046	1.3768	28.557	0.761164	0.510816	1059.34	18.66	806	414	-31	-12	1055.68	17.8
Z_OG1 (Secondary reference material)
ogc - 1		1.39857	0.0118793	0.294998	0.0564808	0.364673	129.153	1.72327	153.967	2.1365	1.19213	3476.5	23	3443	298	-0.96	-2.1	3475.4	20.8
ogc - 2		1.36585	0.0125404	0.313833	0.0598898	0.465137	149.68	3.38594	245.176	5.43194	1.63801	3541.1	26	3539	294	-0.055	-0.12	3541	22
ogc - 3		1.39631	0.0149298	0.286412	0.054698	0.432223	142.117	2.98137	207.052	3.82716	1.45691	3482.3	29	3398	298	-2.5	-5.2	3478.2	24.8
ogc - 4		1.37091	0.0129556	0.297353	0.0568022	0.432787	140.044	2.99671	121.641	1.97111	0.868591	3531.2	25.8	3456	296	-2.2	-4.7	3527.9	22.4
ogc - 5		1.38315	0.0155173	0.289797	0.0551903	0.457051	103.937	1.43851	150.502	4.24532	1.44801	3507.5	31.2	3416	296	-2.7	-5.6	3502.4	26.2
ogc - 6		1.4081	0.0116135	0.292309	0.0557554	0.368584	268.85	6.8785	549.348	11.2853	2.04332	3459.3	22.8	3429	296	-0.88	-1.9	3458.3	20.6
ogc - 7		1.41527	0.0153283	0.31197	0.0595675	0.230138	109.461	2.34557	156.888	3.63393	1.43328	3446.1	28.2	3530	294	2.4	5.3	3448.4	26.8
ogc - 8		1.38989	0.0129539	0.309281	0.0590672	0.344423	121.479	1.88266	193.358	3.21934	1.59171	3493.9	25.2	3517	294	0.65	1.4	3494.7	23
ogc - 9		1.33428	0.0152622	0.286721	0.0547787	0.373628	84.0965	2.82176	101.531	4.09973	1.20731	3606.1	31	3399	298	-6.1	-13	3595.7	27.4
ogc - 10		1.39181	0.0150364	0.319963	0.061121	0.434679	96.5403	2.61982	119.833	2.15994	1.24127	3490	29	3569	294	2.2	4.9	3493.6	25.2
ogc - 11		1.39473	0.012793	0.281043	0.0537028	0.51025	189.568	2.96934	355.748	5.86396	1.87663	3484.2	25	3368	298	-3.5	-7.1	3478.6	20.6

## Sheet: EPMA
Dröllner et al.: Older than they look: cryptic recycled xenotime on detrital zircon
Table S7. Geochemistry of xenotime shown in Figure 3C based on analyses using electron probe micro-analyzer (EPMA).																																											0.4793	0.1542	0.0592	0.2059	0.0375	0.254	0.0554
Analysis ID	Grain ID (in paper)	Element concentrations in wt%																				Normalized Element concentrations in wt%																					Chondrite-normalized (Fig. 3C)
		Zr	Si	Y	P	Ca	Th	U	Ho	Er	Yb	Lu	Eu	Tb	Tm	Nd	Sm	Gd	Dy	O	Sum	Zr	Si	Y	P	Ca	Th	U	Ho	Er	Yb	Lu	Eu	Tb	Tm	Nd	Sm	Gd	Dy	O	Sum	ΣREE	Nd	Sm	Eu	Gd	Tb	Dy	Ho
Xenotime outgrowths
THB002_X10_R6.1	X1	0.247354	0.332156	29.3234	12.7003	0.058118	0.152518	0.155296	1.17603	3.9529	3.09163	0.523718	0.162008	0.503051	0.348626	0.10613	0.294553	1.41279	5.11014	27.2726	86.9233	0.284566	0.382125	33.7348	14.6109	0.0668612	0.175463	0.178659	1.35295	4.54757	3.55673	0.602506	0.18638	0.57873	0.401073	0.122096	0.338865	1.62533	5.87891	31.3755	100	19.1911	2547.38	21975.7	31483.2	78937.8	154328	231453	244215
THB002_HM_R1.1	X2	2.02864	0.947417	26.4642	12.8658	0.019998	0	0.270705	0.777677	3.81525	7.85977	2.03722	0.064466	0.181352	0.684978	0.084784	0.11049	0.569826	2.47589	28.2439	89.5023	2.26658	1.05854	29.5682	14.3748	0.0223436	0	0.302456	0.868891	4.26274	8.78164	2.27616	0.0720272	0.202623	0.765319	0.0947283	0.123449	0.636661	2.76629	31.5566	100	20.8505	1976.39	8005.79	12166.8	30920.9	54032.7	108909	156839
THB002_X10_R3.1		0.611102	0.162517	32.303	14.4567	0.050755	0	0.290135	1.04359	3.65299	3.61351	0.760744	0.080125	0.471333	0.338155	0.262096	0.352772	1.6324	4.54003	30.2816	94.9036	0.643919	0.171244	34.0377	15.233	0.0534806	0	0.305715	1.09963	3.84916	3.80756	0.801597	0.0844278	0.496644	0.356314	0.276171	0.371716	1.72006	4.78383	31.9077	100	17.6472	5761.96	24106.1	14261.4	83538.7	132438	188340	198489
THB002_X10_R3.2		1.36885	0.433204	34.7957	15.3274	0.046617	0.079979	0.276401	1.00005	3.62719	3.60419	0.744661	0.041545	0.440753	0.37123	0.167646	0.367748	1.53053	4.32016	32.5797	101.124	1.35364	0.428389	34.4089	15.157	0.0460988	0.07909	0.273329	0.988934	3.58687	3.56413	0.736384	0.0410832	0.435854	0.367104	0.165783	0.36366	1.51352	4.27214	32.2176	99.9996	16.0359	3458.85	23583.7	6939.73	73507.4	116228	168195	178508
THB002_X10_R3 mean	X4	0.989976	0.29786	33.5493	14.8921	0.048686	0.0399895	0.283268	1.02182	3.64009	3.60885	0.752703	0.060835	0.456043	0.354692	0.214871	0.36026	1.58147	4.43009	31.4306	98.0138	1.01004	0.303896	34.2292	15.1938	0.0496726	0.0407999	0.289008	1.04253	3.71385	3.68198	0.767956	0.0620678	0.465284	0.36188	0.219225	0.36756	1.61351	4.51987	32.0676	99.9997	16.816	4573.86	23836.6	10484.4	78363.9	124076	177948	188182
THB002_X11_R1.1	X5	0.032172	0.220119	34.4292	14.8429	0.013578	0.799079	0.924693	1.03252	3.79433	3.01414	0.576023	0.065742	0.397392	0.290446	0.186893	0.293494	1.43546	4.55814	31.238	98.1443	0.0327803	0.224281	35.0802	15.1235	0.0138347	0.814188	0.942177	1.05204	3.86607	3.07113	0.586914	0.066985	0.404906	0.295938	0.190427	0.299043	1.4626	4.64432	31.8286	100	15.9404	3973.02	19393.2	11315	71034.6	107975	182847	189899
THB002_X6_R1.1		1.01455	0.587351	30.6422	14.0663	0.570452	0.402831	0.149268	0.855847	3.10725	3.41342	0.741498	0.135752	0.425916	0.310284	0.452662	0.494002	1.58496	3.69048	29.9821	92.6271	1.09531	0.634103	33.0812	15.1859	0.615859	0.434895	0.161149	0.92397	3.35458	3.68512	0.80052	0.146558	0.459818	0.334982	0.488693	0.533323	1.71112	3.98423	32.3686	100	16.4229	10196	34586.5	24756.3	83104.4	122618	156860	166782
THB002_X6_R1.2		1.1319	0.573568	30.5853	13.8829	0.525892	0.447651	0.178725	0.827909	3.07155	3.24259	0.720569	0.141991	0.414943	0.295758	0.491125	0.52137	1.51163	3.50292	29.6811	91.7494	1.23369	0.625146	33.3357	15.1313	0.573183	0.487906	0.194797	0.902359	3.34776	3.53418	0.785366	0.15476	0.452257	0.322354	0.53529	0.568254	1.64756	3.81792	32.3502	100	16.0681	11168.2	36851.8	26141.8	80017.7	120602	150312	162881
THB002_X6_R1 mean	X6	1.07322	0.580459	30.6137	13.9746	0.548172	0.425241	0.163996	0.841878	3.0894	3.32801	0.731034	0.138872	0.42043	0.303021	0.471893	0.507686	1.54829	3.5967	29.8316	92.1882	1.16417	0.629646	33.2079	15.1588	0.594622	0.461275	0.177893	0.913216	3.35119	3.61001	0.792979	0.150639	0.456055	0.328698	0.51188	0.550706	1.67949	3.90147	32.3594	100	16.2463	10679.7	35713.7	25445.8	81568.4	121615	153601	164840
THB002_X6_R3.1	X7	0.193978	0.076524	32.606	14.8401	0.054677	0.380105	0.477477	0.997341	3.38469	2.88997	0.523868	0	0.488657	0.289931	0.529957	0.63442	1.87432	4.26338	30.5839	95.0892	0.203996	0.080476	34.2899	15.6065	0.0575007	0.399735	0.502136	1.04885	3.55949	3.03922	0.550923	0	0.513893	0.304904	0.557326	0.667184	1.97112	4.48356	32.1634	100	16.6964	11627.9	43267.4		95731.8	137038	176518	189323
Xenotime inclusion
THB002_X6_R2.1	X8	0.033528	0.136422	33.3359	15.0353	0.005174	0.662508	0.511277	0.973907	3.79109	4.37348	0.934612	0.040339	0.366105	0.453071	0.27847	0.420836	1.33553	3.67214	31.1513	97.511	0.0343838	0.139904	34.1868	15.4191	0.00530607	0.679419	0.524328	0.998766	3.88786	4.48511	0.958468	0.0413687	0.37545	0.464636	0.285578	0.431578	1.36962	3.76587	31.9464	100	17.0643	5958.23	27988.2	6987.95	66518.7	100120	148263	180283
Detrital xenotime
THB001-HM-D1		0.197112	0.054796	34.1032	14.9667	0.012852	0.189841	0.334771	0.996335	3.55235	2.88636	0.477329	0.02587	0.45066	0.287593	0.213482	0.419616	1.62364	4.45359	30.9837	96.2298	0.204835	0.0569429	35.4393	15.5531	0.0133555	0.197279	0.347887	1.03537	3.69153	2.99945	0.49603	0.0268836	0.468316	0.298861	0.221846	0.436056	1.68725	4.62808	32.1976	100	15.9897	4628.54	28278.6	4541.14	81945.3	124884	182208	186890
THB001-HM-D13		0	0	35.08	15.3984	0.005513	0.009799	0.136134	1.13305	5.26862	5.41121	1.02405	0.018835	0.207961	0.586854	0.007501	0.009355	0.438411	3.74348	31.9295	100.409	0	0	34.9371	15.3357	0.00549054	0.00975909	0.135579	1.12843	5.24716	5.38917	1.01988	0.0187583	0.207114	0.584464	0.00747045	0.00931689	0.436625	3.72823	31.7994	99.9997	17.7769	155.862	604.208	3168.63	21205.7	55230.4	146781	203689
THB001-HM-D15		0.022242	0.096649	35.832	15.1889	0.03422	0.250274	0.944283	0.992345	3.57484	2.58578	0.406455	0.039122	0.376118	0.274858	0.185577	0.244425	1.29344	4.34499	31.6638	98.3504	0.0226151	0.0982701	36.433	15.4437	0.034794	0.254472	0.960121	1.00899	3.6348	2.62915	0.413272	0.0397782	0.382427	0.279468	0.18869	0.248525	1.31513	4.41787	32.1949	99.9999	14.5582	3936.77	16117	6719.29	63872.5	101980	173932	182128
THB001-HM-D25		0	0	35.3306	15.3872	0.042812	0.070022	0.667819	1.02947	3.64557	2.8357	0.507591	0.04016	0.443412	0.286109	0.295649	0.401258	1.65916	4.70185	31.8359	99.1803	0	0	35.6226	15.5144	0.0431658	0.0706007	0.673338	1.03798	3.6757	2.85914	0.511786	0.0404919	0.447077	0.288474	0.298092	0.404574	1.67287	4.74071	32.099	100	15.9769	6219.33	26237	6839.85	81246.8	119220	186642	187361
THB001-HM-D3		0.039596	0.074934	34.4201	15.2551	0.047112	0.290572	0.638942	1.0595	4.00296	3.0906	0.594985	0.021089	0.396685	0.310563	0.40362	0.486983	1.49293	4.58733	31.6328	98.8464	0.0400581	0.0758085	34.8218	15.4331	0.0476618	0.293963	0.646399	1.07187	4.04968	3.12667	0.601929	0.0213351	0.401315	0.314187	0.408331	0.492666	1.51035	4.64087	32.002	100	16.6392	8519.31	31949.8	3603.91	73353.7	107017	182711	193477
THB001-HM-D31		0	0.053312	36.6502	15.5941	0	0	0.278435	1.03134	4.95033	4.35619	0.827097	0.012184	0.144532	0.500679	0.027874	0.021368	0.325904	3.09492	32.318	100.187	0	0.0532125	36.5818	15.565	0	0	0.277915	1.02941	4.94109	4.34806	0.825553	0.0121613	0.144262	0.499744	0.027822	0.0213281	0.325296	3.08914	32.2577	99.9995	15.2644	580.471	1383.15	2054.27	15798.7	38469.9	121620	185815
THB001-HM-D42		0.001725	0.020577	35.0448	15.3319	0.055542	0.203939	0.639095	1.03441	3.88694	3.02006	0.536814	0.034733	0.397495	0.302772	0.319242	0.375899	1.50811	4.37086	31.7185	98.8035	0.00174589	0.0208262	35.4692	15.5176	0.0562146	0.206409	0.646834	1.04694	3.93401	3.05663	0.543315	0.0351536	0.402309	0.306439	0.323108	0.380451	1.52637	4.42379	32.1026	99.9999	15.9786	6741.25	24672.6	5938.11	74131.8	107282	174165	188978
THB001-HM-D5		0	0	36.4981	15.3771	0.023114	0.050038	0.444852	1.05858	3.27955	1.83695	0.277513	0.042845	0.453437	0.176272	0.226173	0.346293	1.56182	4.74493	31.8365	98.234	0	0	37.1542	15.6535	0.0235295	0.0509376	0.452849	1.07761	3.33851	1.86997	0.282502	0.0436152	0.461589	0.179441	0.230239	0.352518	1.5899	4.83023	32.4088	100	14.2561	4803.65	22861.1	7367.44	77217	123090	190167	194515
THB001-HM-D53		0	0.045646	34.9083	15.2321	0.057049	0.390802	0.425503	1.06776	3.81438	2.95176	0.552746	0.035898	0.405787	0.3215	0.269976	0.3609	1.50551	4.2754	31.5446	98.1656	0	0.046499	35.5606	15.5167	0.0581151	0.398105	0.433454	1.08771	3.88566	3.00692	0.563075	0.0365688	0.41337	0.327508	0.275021	0.367644	1.53364	4.35529	32.1341	100	15.8524	5737.97	23842	6177.17	74484.9	110232	171468	196338
THB001-HM-D7		0	0.009636	33.8568	15.1273	0.05556	0.297399	0.463	1.06096	3.3957	2.24934	0.394954	0.0559	0.573504	0.210802	0.510288	0.589765	2.23297	5.34147	31.2535	97.6789	0	0.00986498	34.6613	15.4868	0.0568802	0.304466	0.474002	1.08617	3.47639	2.30279	0.404339	0.0572283	0.587132	0.215811	0.522414	0.603779	2.28603	5.4684	31.9962	99.9999	17.0105	10899.5	39155.6	9666.95	111026	156569	215291	196060
THB001-HM-D8		0.023431	0.056188	34.0628	15.114	0.053475	0.256547	0.940089	1.01186	3.81893	3.66278	0.767775	0.016672	0.409554	0.359463	0.265259	0.306837	1.4052	4.63675	31.3854	98.5529	0.023775	0.057013	34.563	15.3359	0.0542602	0.260314	0.953893	1.02672	3.87501	3.71656	0.779049	0.0169168	0.415568	0.364741	0.269154	0.311342	1.42583	4.70483	31.8462	100	16.9056	5615.56	20190.8	2857.57	69248.8	110818	185230	185328
THB001-HM-D9		0	0.121943	34.8115	15.3608	0.041853	0.209792	1.00092	0.974887	3.75405	3.27329	0.636886	0.015224	0.411945	0.325932	0.278143	0.415924	1.50025	4.38782	31.8761	99.3974	0	0.122682	35.0225	15.4539	0.0421067	0.211064	1.00699	0.980797	3.77681	3.29313	0.640747	0.0153163	0.414442	0.327908	0.279829	0.418446	1.50935	4.41442	32.0693	99.9999	16.0713	5838.29	27136.5	2587.21	73304.8	110518	173796	177039
[truncated: 4 more columns]

## Sheet: G51178
Dröllner, M., et al., 2023, Older than they look: Cryptic recycled xenotime on detrital zircon: Geology, https://doi.org/10.1130/G51178.1
